# Supplementary material for: Effect of immunosuppressive therapy on interferon γ release assay for latent tuberculosis screening in patients with autoimmune diseases: a systematic review and meta-analysis
Source: HighWire-hosted journal article supplement (doi:10.1136/thoraxjnl-2015-207811), 2015-12-11

## Supplementary Figures

***Supplementary Figure 1.*** Funnel plot of studies included in the primary outcome analysis.

***Supplementary Figure 2.*** Forest plots of studies comparing indeterminate IGRA results in patients with or without immunosuppressive therapy.

***Supplementary Figure 3.*** Forest plots of studies comparing positive TST results in patients with or without immunosuppressive therapy.

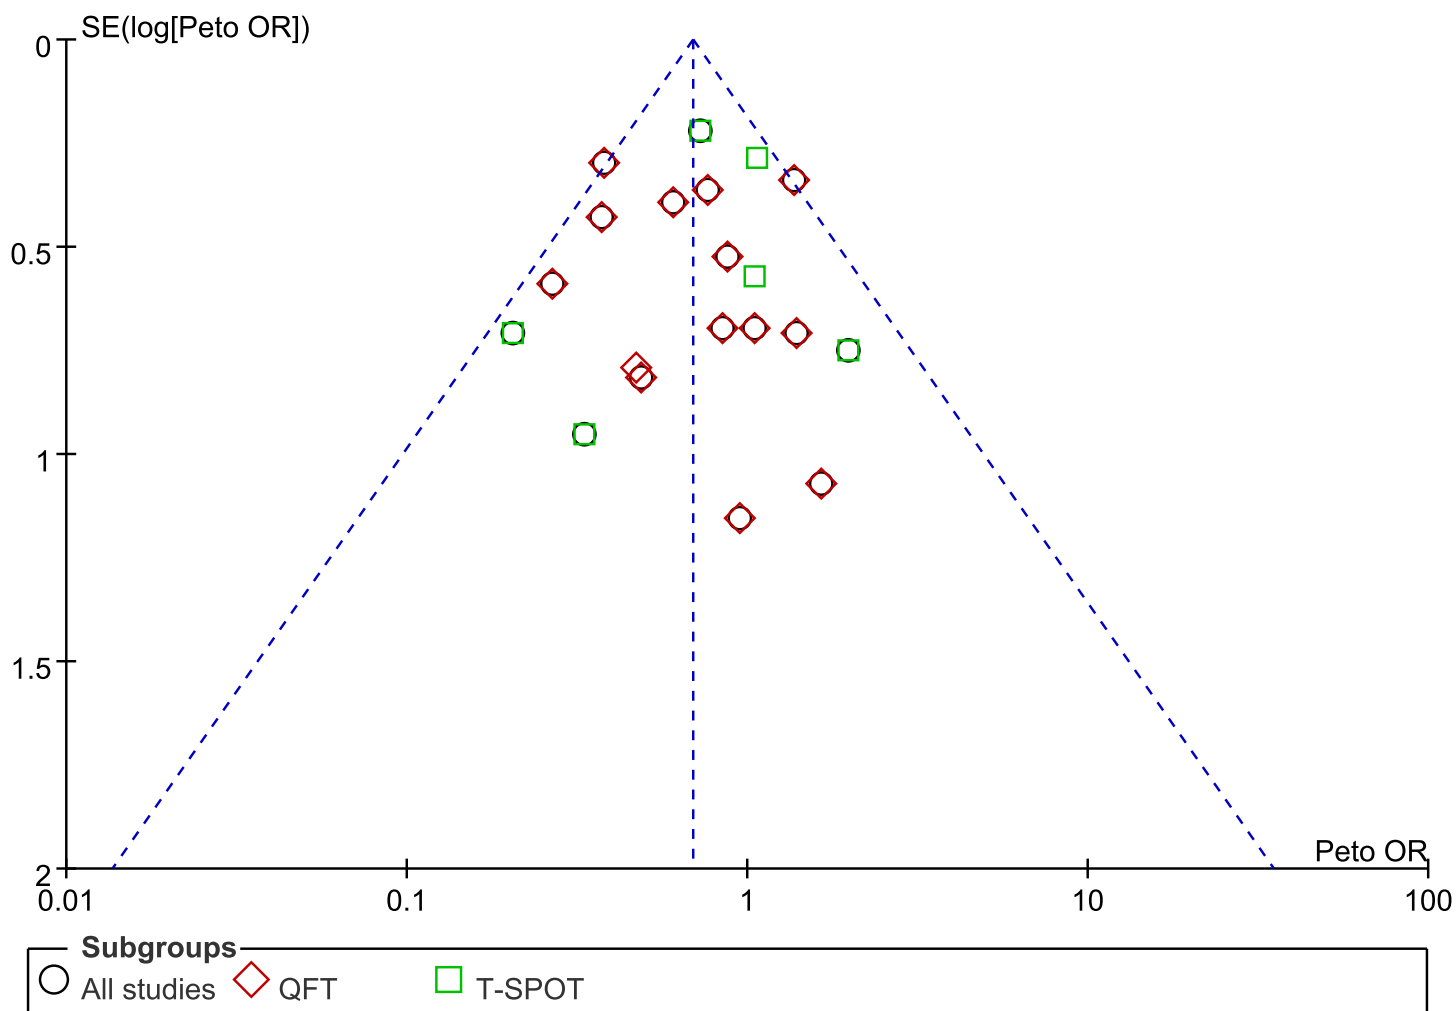

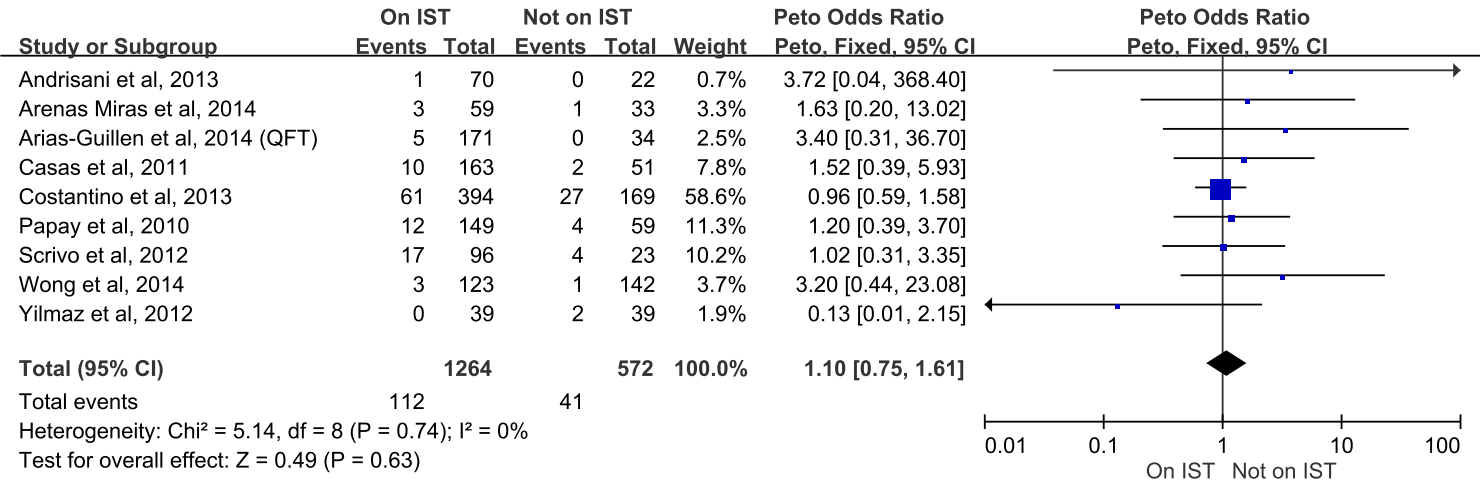

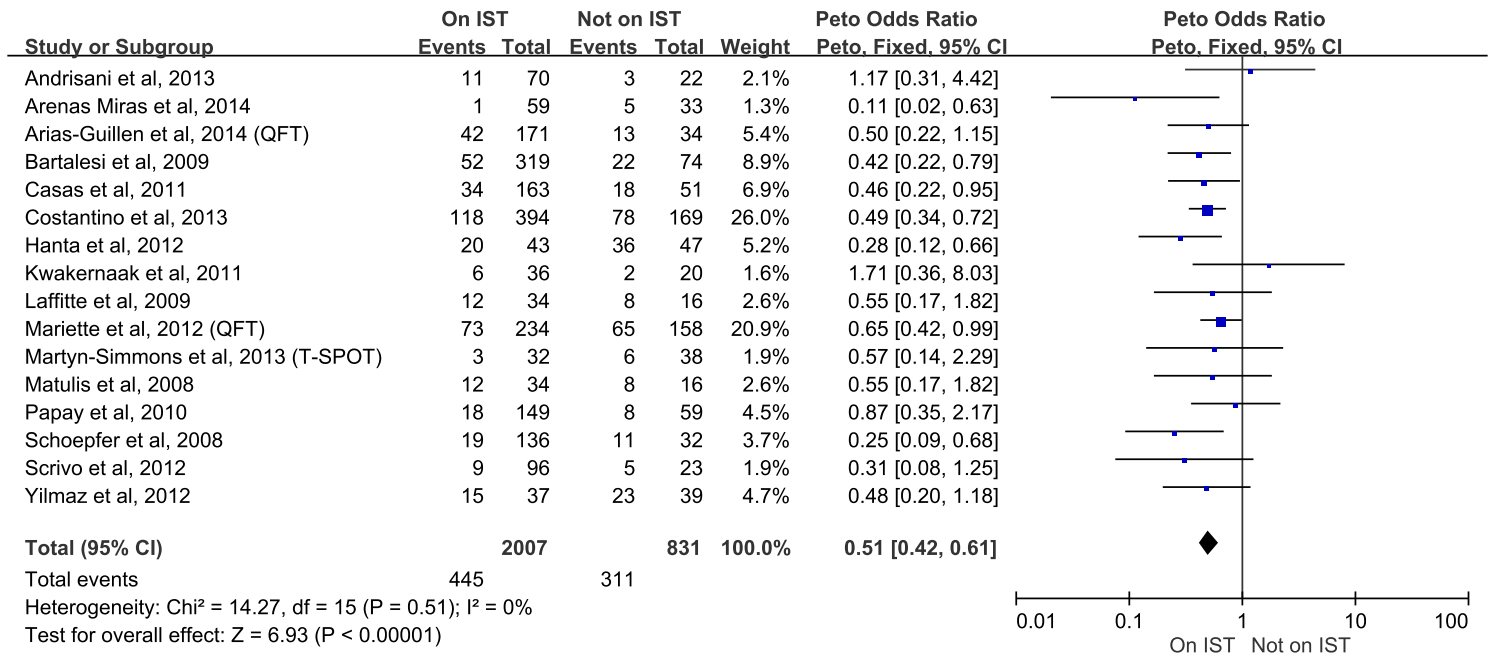

Supplement: thoraxjnl-2015-207811supp_figures.pdf [file thoraxjnl-2015-207811supp_figures.pdf]
